# Supplementary material
Source: MDPI journal article supplement (https://www.mdpi.com/2072-4292/11/21/2468)
Supplement: s1 [file s1]

## Remote Sensing — Change of Authorship Form

(Must be Completed and Signed by ALL Authors)

Manuscript ID: remotesensing-595753

Manuscript Title: Estimating rainfall interception of vegetation canopy from MODIS imageries in southern China

Description of the change: (7 new authors have been added; An author wishes to remove her name)

### Original Authorship

LIST ALL AUTHORS in the same order as the original (first) submission. For more than 10 use an extra sheet.

|             | Name        | Affiliation                                                                  |
|-------------|-------------|------------------------------------------------------------------------------|
| author (1)  | Jianping Wu | Guangzhou Institute of Geography, Guangzhou, China                           |
| author (2)  | Xiuzhi Chen | Sun Yat-sen University, Guangzhou 510275, China <i>Xiuzhi Chen 2019.9.28</i> |
| author (3)  | Yongxian Su | Guangzhou Institute of Geography, Guangzhou, China                           |
| author (4)  | Liyang Liu  | Guangzhou Institute of Geography, Guangzhou, China <i>Li</i>                 |
| author (6)  | Caihong Sun | Guangzhou Institute of Geography, Guangzhou, China                           |
| author (7)  |             |                                                                              |
| author (8)  |             |                                                                              |
| author (9)  |             |                                                                              |
| author (10) |             |                                                                              |

### New Authorship

All authors must sign below agreeing to the new changes in authorship. The authorship order must match the new title page of the manuscript. Signatures below certify compliance with the author responsibilities on the next page. List ALL AUTHORS in the same order as the new version.

|            | Name        | Email                                                                          | Affiliation                                        | Signature & Date             |
|------------|-------------|--------------------------------------------------------------------------------|----------------------------------------------------|------------------------------|
| author (1) | Jianping Wu | <a href="mailto:wujianping@gdas.ac.cn">wujianping@gdas.ac.cn</a>               | Guangzhou Institute of Geography, Guangzhou, China | <i>Jianping Wu 2019.9.28</i> |
| author (2) | Liyang Liu  | <a href="mailto:liuliyang18@mails.ucas.ac.cn">liuliyang18@mails.ucas.ac.cn</a> | Guangzhou Institute of Geography, Guangzhou, China | <i>Liyang Liu 2019.09.28</i> |
| author (3) | Caihong Sun | <a href="mailto:s_caihong@outlook.com">s_caihong@outlook.com</a>               | Guangzhou Institute of Geography, Guangzhou, China | <i>Caihong Sun 2019.9.28</i> |



|             |                |                                                                  |                                                    |                             |
|-------------|----------------|------------------------------------------------------------------|----------------------------------------------------|-----------------------------|
| author (4)  | Yongxian Su    | <a href="mailto:suyongxian@gdas.ac.cn">suyongxian@gdas.ac.cn</a> | Guangzhou Institute of Geography, Guangzhou, China | Yongxian Su<br>2019.09.28   |
| author (5)  | Changjian Wang | <a href="mailto:wangcj@gdas.ac.cn">wangcj@gdas.ac.cn</a>         | Guangzhou Institute of Geography, Guangzhou, China | Changjian Wang<br>2019.9.28 |
| author (6)  | Ji Yang        | <a href="mailto:yangji@gdas.ac.cn">yangji@gdas.ac.cn</a>         | Guangzhou Institute of Geography, Guangzhou, China | Ji Yang<br>2019.9.28        |
| author (7)  | Jiayuan Liao   | <a href="mailto:jiangchu@xtbg.ac.cn">jiangchu@xtbg.ac.cn</a>     | Guangzhou Institute of Geography, Guangzhou, China | Jiayuan Liao<br>2019.9.28   |
| author (8)  | Xiaolei He     | <a href="mailto:charles@scbg.ac.cn">charles@scbg.ac.cn</a>       | Guangzhou Institute of Geography, Guangzhou, China | Xiaolei He<br>2019.9.28     |
| author (9)  | Qian Li        | <a href="mailto:wangjun@gdas.ac.cn">wangjun@gdas.ac.cn</a>       | Guangzhou Institute of Geography, Guangzhou, China | Qian Li<br>2019.9.28        |
| author (10) | Chaoqun Zhang  | 2111801073@e.gzhu.edu.cn                                         | Guangzhou Institute of Geography, Guangzhou, China | Chaoqun Zhang<br>2019.09.28 |
| author (11) | Hongou Zhang   | <a href="mailto:hozhang@gdas.ac.cn">hozhang@gdas.ac.cn</a>       | Guangzhou Institute of Geography, Guangzhou, China | Hongou Zhang<br>2019.9.28   |

Please list all the author's Contribution here:

| Author's Contribution                                           |
|-----------------------------------------------------------------|
| author (1) Writing - original draft; Writing - review & editing |
| author (2) Software                                             |
| author (3) Data curation                                        |
| author (4) Conceptualization; Writing - review & editing        |
| author (5) Data curation                                        |
| author (6) Data curation                                        |
| author (7) Formal analysis                                      |
| author (8) Formal analysis                                      |
| author (9) Investigation                                        |
| author (10) Investigation                                       |
| author (11) Supervision                                         |

#### Contributor Roles Taxonomy (CRediT)

|                   |                                                                                                                                                                                                                 |
|-------------------|-----------------------------------------------------------------------------------------------------------------------------------------------------------------------------------------------------------------|
| Conceptualization | Ideas; formulation or evolution of overarching research goals and aims.                                                                                                                                         |
| Data curation     | Management activities to annotate (produce metadata), scrub data and maintain research data (including software code, where it is necessary for interpreting the data itself) for initial use and later re-use. |
| Formal analysis   | Application of statistical, mathematical, computational, or other formal                                                                                                                                        |



|                            |                                                                                                                                                                                                              |
|----------------------------|--------------------------------------------------------------------------------------------------------------------------------------------------------------------------------------------------------------|
|                            | techniques to analyze or synthesize study data.                                                                                                                                                              |
| Funding acquisition        | Acquisition of the financial support for the project leading to this publication.                                                                                                                            |
| Investigation              | Conducting a research and investigation process, specifically performing the experiments, or data/evidence collection.                                                                                       |
| Methodology                | Development or design of methodology; creation of models.                                                                                                                                                    |
| Project administration     | Management and coordination responsibility for the research activity planning and execution.                                                                                                                 |
| Resources                  | Provision of study materials, reagents, materials, patients, laboratory samples, animals, instrumentation, computing resources, or other analysis tools.                                                     |
| Software                   | Programming, software development; designing computer programs; implementation of the computer code and supporting algorithms; testing of existing code components.                                          |
| Supervision                | Oversight and leadership responsibility for the research activity planning and execution, including mentorship external to the core team.                                                                    |
| Validation                 | Verification, whether as a part of the activity or separate, of the overall replication/reproducibility of results/experiments and other research outputs.                                                   |
| Visualization              | Preparation, creation and/or presentation of the published work, specifically visualization/data presentation.                                                                                               |
| Writing - original draft   | Preparation, creation and/or presentation of the published work, specifically writing the initial draft (including substantive translation).                                                                 |
| Writing - review & editing | Preparation, creation and/or presentation of the published work by those from the original research group, specifically critical review, commentary or revision – including pre- or post-publication stages. |
