# Supplementary material
Source: MDPI journal article supplement (https://www.mdpi.com/2072-4292/11/21/2468)
Supplement: s1 [file s1]

# CERTIFICATE OF ENGLISH EDITING

This document certifies that the paper listed below has been edited to ensure that the language is clear and free of errors. The edit was performed by professional editors at Editage, a division of Cactus Communications. The intent of the author's message was not altered in any way during the editing process. The quality of the edit has been guaranteed, with the assumption that our suggested changes have been accepted and have not been further altered without the knowledge of our editors.

## TITLE OF THE PAPER

Estimating rainfall interception of vegetation canopy from MODIS imageries in southern China

## AUTHORS

Jianping Wu, Yongxian Su, Liyang Liu, Caihong Sun, Hongou Zhang, Xia Zhou, Yuyao Ye, Changjian Wang, Ji Yang, Jiayuan Liao, Xiaolei He

## JOB CODE

VTJMW\_1

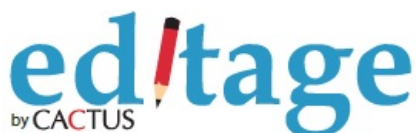

Signature

Vikas Narang

Vikas Narang,  
Chief Operating Officer,  
Editage

Date of Issue  
**September 26, 2019**

Editage, a brand of Cactus Communications, offers professional English language editing and publication support services to authors engaged in over 500 areas of research. Through its community of experienced editors, which includes doctors, engineers, published scientists, and researchers with peer review experience, Editage has successfully helped authors get published in internationally reputed journals. Authors who work with Editage are guaranteed excellent language quality and timely delivery.

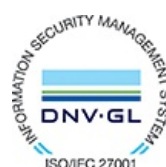

CACTUS

### Contact Editage

Worldwide  
request@editage.com  
+1 877-334-8243  
www.editage.com

Japan  
submissions@editage.com  
+81 03-6868-3348  
www.editage.jp

Korea  
submit-  
korea@editage.com  
1544-9241  
www.editage.co.kr

China  
fabiao@editage.cn  
400-005-6055  
www.editage.cn

Brazil  
contato@editage.com  
0800-892-20-97  
www.editage.com.br
